# Supplementary material for: Profiling the proteomic inflammatory state of human astrocytes using DIA mass spectrometry
Source: J Neuroinflammation. 2018 Nov 30;15:331. doi: 10.1186/s12974-018-1371-6 (PMC6267034; doi:10.1186/s12974-018-1371-6)
Supplement: Supplementary file 5 — List of proteins that were found significantly changing (FDR < 0.05, |FC| > 1.2) under at least one condition (TNF, IL-1β, and LPS). (XLSX 33 kb) [file 12974_2018_1371_MOESM5_ESM.xlsx]

## Sheet: Table S1 
				TNF/CTRL		IL-1beta/CTRL		LPS/CTRL
Protein AC	Gene name	Protein ID	Description	log2(ratio)	FDR	log2(ratio)	FDR	log2(ratio)	FDR
Q8NE71	ABCF1	ABCF1_HUMAN	ATP-binding cassette sub-family F member 1	0.352308	4.79128e-05	0.184814	0.0856633	0.0476519	0.955877
O94929	ABLIM3	ABLM3_HUMAN	Actin-binding LIM protein 3;Isoform 2 of Actin-binding LIM protein 3;Isoform 3 of Actin-binding LIM protein 3	0.330898	0.711641	0.902766	0.0319725	0.390637	0.886318
P21399	ACO1	ACOC_HUMAN	Cytoplasmic aconitate hydratase	0.448201	3.43061e-06	0.62119	3.07449e-11	-0.145079	0.818775
P62736	ACTA2	ACTA_HUMAN	Actin, aortic smooth muscle	-0.318436	0.00542843	-0.26741	0.0343127	-0.168977	0.567337
P55265	ADAR	DSRAD_HUMAN	Double-stranded RNA-specific adenosine deaminase;Isoform 4 of Double-stranded RNA-specific adenosine deaminase	0.382871	8.4263e-05	0.129406	0.762868	0.589169	2.80194e-06
P35611	ADD1	ADDA_HUMAN	Alpha-adducin;Isoform 2 of Alpha-adducin;Isoform 3 of Alpha-adducin;Isoform 6 of Alpha-adducin	-0.334539	0.013509	-0.312057	0.044562	-0.0850067	0.94633
Q09666	AHNAK	AHNK_HUMAN	Neuroblast differentiation-associated protein AHNAK	-0.201057	0.00879707	-0.286021	8.82796e-06	-0.101131	0.829491
Q02952	AKAP12	AKA12_HUMAN	A-kinase anchor protein 12	0.333505	0.00222236	0.297372	0.000250292	0.0244972	0.964322
Q9Y2D5-6	AKAP2	AKAP2_HUMAN	Isoform 4 of A-kinase anchor protein 2	0.337206	0.00151027	0.245867	0.142439	0.103732	0.889473
P15121	AKR1B1	ALDR_HUMAN	Aldose reductase	0.628901	2.56357e-09	0.49571	2.40437e-07	0.103596	0.913314
P49419	ALDH7A1	AL7A1_HUMAN	Alpha-aminoadipic semialdehyde dehydrogenase;Isoform 2 of Alpha-aminoadipic semialdehyde dehydrogenase	-0.0144903	0.965612	-0.340607	0.0083288	-0.211063	0.80596
P15144	ANPEP	AMPN_HUMAN	Aminopeptidase N	0.0633757	0.957852	0.383582	0.000850771	0.0961203	0.920033
P04083	ANXA1	ANXA1_HUMAN	Annexin A1	-0.295069	0.0020142	-0.229769	0.248708	-0.0726349	0.944858
P50995	ANXA11	ANX11_HUMAN	Annexin A11;Isoform 2 of Annexin A11	-0.366103	3.12424e-05	-0.337018	0.000282936	-0.0470036	0.959421
Q92974	ARHGEF2	ARHG2_HUMAN	Rho guanine nucleotide exchange factor 2;Isoform 2 of Rho guanine nucleotide exchange factor 2;Isoform 3 of Rho guanine nucleotide exchange factor 2	0.475145	3.742e-06	0.367286	6.01314e-05	0.159625	0.715732
Q7Z3C6	ATG9A	ATG9A_HUMAN	Autophagy-related protein 9A;Isoform 2 of Autophagy-related protein 9A	-0.435744	0.00788976	-0.343617	0.126137	0.0522933	0.956425
P16615	ATP2A2	AT2A2_HUMAN	Sarcoplasmic/endoplasmic reticulum calcium ATPase 2	-0.295507	0.00126131	-0.240401	0.00684469	-0.0620569	0.947913
P61769	B2M	B2MG_HUMAN	Beta-2-microglobulin	1.19275	0.000433359	0.358037	0.894627	0.480196	0.609246
Q9UQB8	BAIAP2	BAIP2_HUMAN	Brain-specific angiogenesis inhibitor 1-associated protein 2;Isoform 2 of Brain-specific angiogenesis inhibitor 1-associated protein 2	-0.653505	6.58999e-06	-0.56674	4.43684e-05	-0.126037	0.931351
Q9NRL2	BAZ1A	BAZ1A_HUMAN	Bromodomain adjacent to zinc finger domain protein 1A;Isoform 2 of Bromodomain adjacent to zinc finger domain protein 1A	0.578034	0.00020441	0.287759	0.587659	0.0782291	0.952544
P50895	BCAM	BCAM_HUMAN	Basal cell adhesion molecule	-0.506431	0.0211551	-0.347238	0.317741	-0.229123	0.871362
P55957	BID	BID_HUMAN	BH3-interacting domain death agonist;Isoform 2 of BH3-interacting domain death agonist	0.605083	0.00950387	0.408401	0.139938	0.12059	0.944963
P16070	CD44	CD44_HUMAN	CD44 antigen;Isoform 10 of CD44 antigen;Isoform 11 of CD44 antigen;Isoform 12 of CD44 antigen;Isoform 13 of CD44 antigen;Isoform 14 of CD44 antigen;Isoform 16 of CD44 antigen;Isoform 17 of CD44 antigen;Isoform 18 of CD44 antigen;Isoform 3 of CD44 antigen;Isoform 4 of CD44 antigen;Isoform 5 of CD44 antigen;Isoform 6 of CD44 antigen;Isoform 7 of CD44 antigen;Isoform 8 of CD44 antigen	0.400713	6.68965e-07	0.439468	1.96655e-07	0.0188616	0.964626
Q08722	CD47	CD47_HUMAN	Leukocyte surface antigen CD47;Isoform OA3-293 of Leukocyte surface antigen CD47;Isoform OA3-305 of Leukocyte surface antigen CD47;Isoform OA3-312 of Leukocyte surface antigen CD47	0.688128	0.104938	0.412118	0.0180157	0.191317	0.838942
P27701	CD82	CD82_HUMAN	CD82 antigen	1.69552	0.000114423	1.6124	0.000137109	0.862903	0.231882
P19022	CDH2	CADH2_HUMAN	Cadherin-2;Isoform 2 of Cadherin-2	0.429316	0.026758	0.185601	0.836313	0.166212	0.897837
Q00534	CDK6	CDK6_HUMAN	Cyclin-dependent kinase 6	0.721234	1.75898e-06	0.475838	0.00156112	0.0170645	0.965609
Q9UKY7	CDV3	CDV3_HUMAN	Protein CDV3 homolog	0.454426	9.46306e-06	0.346786	1.14465e-05	0.108878	0.852612
P17676	CEBPB	CEBPB_HUMAN	CCAAT/enhancer-binding protein beta;Isoform 2 of CCAAT/enhancer-binding protein beta	0.520981	0.52521	1.38789	0.00112372	0.216232	0.898096
Q07065	CKAP4	CKAP4_HUMAN	Cytoskeleton-associated protein 4	0.280561	0.00416508	0.214551	0.0705705	0.172005	0.452213
P78357	CNTNAP1	CNTP1_HUMAN	Contactin-associated protein 1	0.631634	0.00166225	0.439293	0.114901	0.125754	0.946195
P39060	COL18A1	COIA1_HUMAN	Collagen alpha-1(XVIII) chain;Isoform 2 of Collagen alpha-1(XVIII) chain;Isoform 3 of Collagen alpha-1(XVIII) chain	-0.838323	4.33598e-12	-0.802059	3.72142e-10	0.0138256	0.965475
P02452	COL1A1	CO1A1_HUMAN	Collagen alpha-1(I) chain	-1.3831	3.77476e-16	-1.19884	6.42819e-14	0.114439	0.934327
P08123	COL1A2	CO1A2_HUMAN	Collagen alpha-2(I) chain	-0.921607	0.045508	-0.878663	0.0155172	0.0840986	0.932032
O75976	CPD	CBPD_HUMAN	Carboxypeptidase D	-0.387248	0.00298051	-0.121849	0.818611	-0.777406	0.917566
P02511	CRYAB	CRYAB_HUMAN	Alpha-crystallin B chain	-0.40677	0.033533	-0.590754	0.00215125	-0.463314	0.937931
P07339	CTSD	CATD_HUMAN	Cathepsin D	-0.512641	0.194092	-0.381903	0.0193061	0.00243347	0.966627
P00167	CYB5A	CYB5_HUMAN	Cytochrome b5;Isoform 2 of Cytochrome b5	0.605668	6.46043e-05	0.27424	0.241537	0.212018	0.72453
Q16643	DBN1	DREB_HUMAN	Drebrin	-0.247902	0.298273	-0.28143	0.0221141	-0.125456	0.873509
Q9NR30	DDX21	DDX21_HUMAN	Nucleolar RNA helicase 2	0.297708	0.000645545	0.339891	0.000193479	0.0414146	0.961064
Q15392	DHCR24	DHC24_HUMAN	Delta(24)-sterol reductase;Isoform 2 of Delta(24)-sterol reductase	-0.249222	0.72434	-0.32297	0.0399342	0.0274099	0.959271
P31689	DNAJA1	DNJA1_HUMAN	DnaJ homolog subfamily A member 1	0.448178	0.00281712	0.352246	0.124881	0.152175	0.894599
Q9ULA0	DNPEP	DNPEP_HUMAN	Aspartyl aminopeptidase	0.331552	0.00100291	0.504271	9.58206e-08	0.187929	0.783864
Q16555	DPYSL2	DPYL2_HUMAN	Dihydropyrimidinase-related protein 2;Isoform 2 of Dihydropyrimidinase-related protein 2	0.228854	0.00568852	0.399541	1.09049e-08	0.0453992	0.957703
Q14195	DPYSL3	DPYL3_HUMAN	Dihydropyrimidinase-related protein 3;Isoform LCRMP-4 of Dihydropyrimidinase-related protein 3	0.326062	0.000182854	0.0822616	0.874926	0.0350322	0.962017
P15924	DSP	DESP_HUMAN	Desmoplakin	-0.00409924	0.966301	-0.465724	5.73037e-07	0.184908	0.512691
Q8TDB6	DTX3L	DTX3L_HUMAN	E3 ubiquitin-protein ligase DTX3L	1.3944	0.00583076	0.184265	0.874064	2.03147	0.00161159
P00533	EGFR	EGFR_HUMAN	Epidermal growth factor receptor	0.588457	2.01685e-06	0.251744	0.278017	0.0768963	0.952522
Q9H4M9	EHD1	EHD1_HUMAN	EH domain-containing protein 1	0.328152	0.000587919	0.17253	0.406058	0.0303666	0.963292
Q9NZN4	EHD2	EHD2_HUMAN	EH domain-containing protein 2	-0.52665	7.02483e-08	-0.254887	0.00555518	-0.0589354	0.955863
P19525	EIF2AK2	E2AK2_HUMAN	Interferon-induced, double-stranded RNA-activated protein kinase	0.397059	0.000266341	0.0877851	0.899445	0.693419	8.5435e-10
P17813	ENG	EGLN_HUMAN	Endoglin;Isoform Short of Endoglin	-0.448106	7.63932e-06	-0.348229	1.52245e-05	-0.119621	0.829998
P07099	EPHX1	HYEP_HUMAN	Epoxide hydrolase 1	-0.325395	9.53647e-05	-0.269416	0.00236347	-0.0521253	0.954758
P58107	EPPK1	EPIPL_HUMAN	Epiplakin	-0.270249	0.0436222	-0.219529	0.675481	0.0908923	0.933089
Q9H6S3	EPS8L2	ES8L2_HUMAN	Epidermal growth factor receptor kinase substrate 8-like protein 2	-0.371765	0.000172425	-0.351804	0.000413016	-0.0836131	0.928448
Q9NZ08	ERAP1	ERAP1_HUMAN	Endoplasmic reticulum aminopeptidase 1;Isoform 2 of Endoplasmic reticulum aminopeptidase 1	0.867884	8.93211e-14	0.581908	1.94447e-08	0.267114	0.322984
P10768	ESD	ESTD_HUMAN	S-formylglutathione hydrolase	-0.161714	0.660957	-0.404368	0.000777747	-0.0740744	0.954504
A0FGR8	ESYT2	ESYT2_HUMAN	Extended synaptotagmin-2;Isoform 2 of Extended synaptotagmin-2;Isoform 6 of Extended synaptotagmin-2	-0.331477	0.0473905	-0.111782	0.899695	-0.0295261	0.964684
P15311	EZR	EZRI_HUMAN	Ezrin	-0.17093	0.363825	-0.298509	0.0327553	-0.00909211	0.965823
Q9BZQ8	FAM129A	NIBAN_HUMAN	Protein Niban	0.407269	1.22053e-05	0.260749	0.0493088	0.0137404	0.965434
P09038	FGF2	FGF2_HUMAN	Fibroblast growth factor 2;Isoform 2 of Fibroblast growth factor 2;Isoform 3 of Fibroblast growth factor 2;Isoform 4 of Fibroblast growth factor 2	0.307984	0.541855	0.785188	0.000107682	-0.104875	0.958624
Q13642	FHL1	FHL1_HUMAN	Four and a half LIM domains protein 1;Isoform 1 of Four and a half LIM domains protein 1;Isoform 4 of Four and a half LIM domains protein 1;Isoform 5 of Four and a half LIM domains protein 1	-0.32873	0.00130804	-0.32161	0.00265749	-0.0910441	0.918531
P21333	FLNA	FLNA_HUMAN	Filamin-A;Isoform 2 of Filamin-A	-0.185173	0.598338	-0.280543	0.0148378	-0.0346082	0.961677
Q14315	FLNC	FLNC_HUMAN	Filamin-C	-0.309825	8.18646e-06	-0.274956	2.86035e-05	-0.0909186	0.876578
O75955	FLOT1	FLOT1_HUMAN	Flotillin-1	-0.255795	0.681912	-0.420407	0.016203	0.0837904	0.953537
Q53EP0	FNDC3B	FND3B_HUMAN	Fibronectin type III domain-containing protein 3B	0.270818	0.40858	0.537592	1.07638e-05	-0.0921995	0.96424
Q16658	FSCN1	FSCN1_HUMAN	Fascin	-0.166368	0.623145	-0.306949	0.0374338	-0.196326	0.714517
P11413	G6PD	G6PD_HUMAN	Glucose-6-phosphate 1-dehydrogenase;Isoform Long of Glucose-6-phosphate 1-dehydrogenase;Isoform 3 of Glucose-6-phosphate 1-dehydrogenase	-0.160607	0.629393	-0.351423	0.000813909	-0.0923767	0.935509
P32455	GBP1	GBP1_HUMAN	Guanylate-binding protein 1	0.681641	3.87237e-08	0.463719	0.000234865	0.493085	8.0175e-07
P78347	GTF2I	GTF2I_HUMAN	General transcription factor II-I;Isoform 2 of General transcription factor II-I;Isoform 3 of General transcription factor II-I;Isoform 4 of General transcription factor II-I	-0.138955	0.801242	-0.282537	0.00726114	-0.0870838	0.947448
P51858	HDGF	HDGF_HUMAN	Hepatoma-derived growth factor	0.28263	0.00427255	0.208476	0.0522659	0.0278554	0.963904
Q9BYK8	HELZ2	HELZ2_HUMAN	Helicase with zinc finger domain 2	1.86575	0.000219659	0.902448	0.18119	1.7917	0.00250657
P01892	HLA-A (A-2 alpha chain)	1A02_HUMAN	HLA class I histocompatibility antigen, A-2 alpha chain	1.27833	0	0.498123	4.68021e-06	0.460241	0.400085
P04439	HLA-A (A-3 alpha chain)	1A03_HUMAN	HLA class I histocompatibility antigen, A-3 alpha chain	1.19038	0	0.557654	1.34479e-09	0.521747	4.10732e-07
P30487	HLA-B	1B49_HUMAN	HLA class I histocompatibility antigen, B-49 alpha chain;HLA class I histocompatibility antigen, B-50 alpha chain	1.40622	0	0.707653	1.0389e-09	0.709764	4.67502e-09
Q29865	HLA-C (cw-18 alpha chain)	1C18_HUMAN	HLA class I histocompatibility antigen, Cw-18 alpha chain	1.05631	6.28203e-09	0.644817	2.06176e-05	0.820184	3.27342e-07
P30504	HLA-C (cw-4 alpha chain)	1C04_HUMAN	HLA class I histocompatibility antigen, Cw-4 alpha chain	0.954832	0.0158586	0.447873	0.399222	0.726666	0.423293
P11021	HSPA5	GRP78_HUMAN	78 kDa glucose-regulated protein	0.26766	3.74914e-05	0.265245	5.12835e-06	0.151125	0.527972
Q9Y4L1	HYOU1	HYOU1_HUMAN	Hypoxia up-regulated protein 1	0.308418	0.00176564	0.388937	2.17295e-07	0.0927659	0.897577
P05362	ICAM1	ICAM1_HUMAN	Intercellular adhesion molecule 1	3.06549	0	2.29999	0	1.18226	2.90819e-10
O75874	IDH1	IDHC_HUMAN	Isocitrate dehydrogenase [NADP] cytoplasmic	-0.223621	0.179902	-0.298425	0.0183982	-0.0293048	0.962541
Q16666	IFI16	IF16_HUMAN	Gamma-interferon-inducible protein 16;Isoform 2 of Gamma-interferon-inducible protein 16;Isoform 3 of Gamma-interferon-inducible protein 16	0.727383	0.00104237	0.297437	0.749673	0.794819	0.00810549
P80217	IFI35	IN35_HUMAN	Interferon-induced 35 kDa protein;Isoform 2 of Interferon-induced 35 kDa protein	0.892694	0.00386577	0.473388	0.182482	1.0185	0.00258225
Q00978	IRF9	IRF9_HUMAN	Interferon regulatory factor 9	1.01257	0.0131881	0.177569	0.852828	1.36143	0.0113281
Q8WZA9	IRGQ	IRGQ_HUMAN	Immunity-related GTPase family Q protein	0.404942	0.000710047	0.241385	0.234312	-0.264439	0.945304
P05161	ISG15	ISG15_HUMAN	Ubiquitin-like protein ISG15	1.66286	1.50337e-06	0.45952	0.400945	2.73944	8.54258e-09
P56199	ITGA1	ITA1_HUMAN	Integrin alpha-1	1.23429	0.00396372	2.23575	1.75745e-05	0.558617	0.592655
P26006	ITGA3	ITA3_HUMAN	Integrin alpha-3;Isoform 2 of Integrin alpha-3	-0.386916	1.90103e-05	-0.2778	0.000614634	0.0391596	0.959486
P08648	ITGA5	ITA5_HUMAN	Integrin alpha-5	0.401269	2.53392e-08	0.260721	0.000392898	0.166919	0.53608
Q63ZY3	KANK2	KANK2_HUMAN	KN motif and ankyrin repeat domain-containing protein 2;Isoform 3 of KN motif and ankyrin repeat domain-containing protein 2	-0.476741	5.58002e-06	-0.131636	0.701995	-0.0433493	0.96125
Q9Y2K7	KDM2A	KDM2A_HUMAN	Lysine-specific demethylase 2A	0.959135	0.000742944	0.713183	0.174728	0.229121	0.835101
O95235	KIF20A	KI20A_HUMAN	Kinesin-like protein KIF20A	-0.380909	0.0176388	-0.252961	0.123627	-0.162907	0.8884
P05783	KRT18	K1C18_HUMAN	Keratin, type I cytoskeletal 18	-0.470743	1.56688e-07	-0.422106	1.34661e-08	0.00742002	0.965989
P08729	KRT7	K2C7_HUMAN	Keratin, type II cytoskeletal 7	-0.31555	0.00182251	-0.253102	0.00406298	-0.0454024	0.957725
P05787	KRT8	K2C8_HUMAN	Keratin, type II cytoskeletal 8;Isoform 2 of Keratin, type II cytoskeletal 8	-0.406116	0.0390468	-0.385291	0.224495	0.0566487	0.958246
P07942	LAMB1	LAMB1_HUMAN	Laminin subunit beta-1	-0.261383	0.00665601	-0.383227	1.63647e-05	-0.0631025	0.94548
P28838	LAP3	AMPL_HUMAN	Cytosol aminopeptidase;Isoform 2 of Cytosol aminopeptidase	0.582961	1.15815e-11	0.229089	0.00116781	0.650138	1.48201e-10
P17931	LGALS3	LEG3_HUMAN	Galectin-3	0.0379048	0.958616	0.33752	1.01041e-05	-0.0202005	0.964319
Q08380	LGALS3BP	LG3BP_HUMAN	Galectin-3-binding protein	0.714463	0.0141653	0.0117292	0.96068	1.06762	4.07878e-05
P02545	LMNA	LMNA_HUMAN	Prelamin-A/C	-0.271057	0.000373398	-0.270804	7.93543e-05	-0.00571798	0.966102
Q8WWI1	LMO7	LMO7_HUMAN	LIM domain only protein 7;Isoform 3 of LIM domain only protein 7	-0.465975	0.000924759	-0.423743	1.02534e-06	-0.0847935	0.926187
P28300	LOX	LYOX_HUMAN	Protein-lysine 6-oxidase	0.935858	5.59694e-05	0.369798	0.386891	0.203851	0.871608
Q9Y4K0	LOXL2	LOXL2_HUMAN	Lysyl oxidase homolog 2	0.615211	0.0116289	0.332352	0.296058	0.103788	0.948488
Q07954	LRP1	LRP1_HUMAN	Prolow-density lipoprotein receptor-related protein 1	-0.630079	6.8627e-10	-0.454666	6.00067e-08	-0.121221	0.827955
P49736	MCM2	MCM2_HUMAN	DNA replication licensing factor MCM2	-0.285654	0.0165593	-0.14597	0.575073	-0.0898666	0.915245
Q9UBG0	MRC2	MRC2_HUMAN	C-type mannose receptor 2	-0.231355	0.040829	-0.26831	0.00482751	-0.0612855	0.950862
P26038	MSN	MOES_HUMAN	Moesin	0.298465	0.00331145	0.267062	0.000561398	0.046678	0.957263
Q92614	MYO18A	MY18A_HUMAN	Unconventional myosin-XVIIIa;Isoform 4 of Unconventional myosin-XVIIIa	-0.483541	0.0125612	-0.181127	0.694736	-0.0185647	0.959893
Q9NZM1	MYOF	MYOF_HUMAN	Myoferlin;Isoform 6 of Myoferlin	-0.297515	7.44528e-05	-0.356133	3.64592e-07	-0.14722	0.611882
P43490	NAMPT	NAMPT_HUMAN	Nicotinamide phosphoribosyltransferase	0.294664	0.000145205	0.596762	1.09093e-12	0.0669891	0.941614
O00483	NDUFA4	NDUA4_HUMAN	Cytochrome c oxidase subunit NDUFA4	-0.35866	0.00856157	-0.920634	1.64997e-09	-0.0448206	0.956842
Q96PU5	NEDD4L	NED4L_HUMAN	E3 ubiquitin-protein ligase NEDD4-like;Isoform 5 of E3 ubiquitin-protein ligase NEDD4-like;Isoform 6 of E3 ubiquitin-protein ligase NEDD4-like;Isoform 7 of E3 ubiquitin-protein ligase NEDD4-like	0.686749	0.00339912	0.594985	0.00646865	0.359043	0.843833
P19838	NFKB1	NFKB1_HUMAN	Nuclear factor NF-kappa-B p105 subunit;Isoform 2 of Nuclear factor NF-kappa-B p105 subunit	0.958662	0.000121565	0.883786	0.000299841	0.316137	0.764541
Q00653	NFKB2	NFKB2_HUMAN	Nuclear factor NF-kappa-B p100 subunit;Isoform 4 of Nuclear factor NF-kappa-B p100 subunit	1.863	0	1.54155	0	0.623678	3.1144e-06
P24468	NR2F2	COT2_HUMAN	COUP transcription factor 2	-0.590233	0.000101381	-0.563608	2.26868e-06	0.0195221	0.965093
P49790	NUP153	NU153_HUMAN	Nuclear pore complex protein Nup153	0.277108	0.000887247	0.189966	0.0809546	0.107406	0.848721
P04181	OAT	OAT_HUMAN	Ornithine aminotransferase, mitochondrial	-0.273655	0.00016312	-0.152252	0.64665	-0.0589078	0.946131
Q9NZT2	OGFR	OGFR_HUMAN	Opioid growth factor receptor;Isoform 2 of Opioid growth factor receptor	0.415762	0.0289595	0.0890875	0.948631	0.551631	0.00449438
Q96CV9	OPTN	OPTN_HUMAN	Optineurin;Isoform 3 of Optineurin	0.415792	0.012874	0.287261	0.265305	0.321546	0.255874
Q01804	OTUD4	OTUD4_HUMAN	OTU domain-containing protein 4	0.588575	0.000354155	0.358548	0.236728	0.156654	0.879176
Q8IVL5	P3H2	P3H2_HUMAN	Prolyl 3-hydroxylase 2	0.947575	1.16105e-07	0.782833	1.30066e-05	0.034863	0.960114
O15460	P4HA2	P4HA2_HUMAN	Prolyl 4-hydroxylase subunit alpha-2;Isoform IIa of Prolyl 4-hydroxylase subunit alpha-2	0.308885	0.00306249	0.604263	5.13106e-10	0.227461	0.34532
Q8WX93	PALLD	PALLD_HUMAN	Palladin;Isoform 3 of Palladin	-0.346094	0.0027376	-0.0630728	0.904704	-0.0658556	0.940457
O43252	PAPSS1	PAPS1_HUMAN	Bifunctional 3'-phosphoadenosine 5'-phosphosulfate synthase 1	-0.12786	0.87099	-0.347535	0.0247756	0.0459276	0.959425
O95340	PAPSS2	PAPS2_HUMAN	Bifunctional 3'-phosphoadenosine 5'-phosphosulfate synthase 2;Isoform B of Bifunctional 3'-phosphoadenosine 5'-phosphosulfate synthase 2	0.309616	0.000457109	0.125257	0.749517	0.189851	0.597937
Q460N5	PARP14	PAR14_HUMAN	Poly [ADP-ribose] polymerase 14;Isoform 1 of Poly [ADP-ribose] polymerase 14	0.94379	0.0382279	0.268135	0.755482	-0.27374	0.937596
O14737	PDCD5	PDCD5_HUMAN	Programmed cell death protein 5	0.470995	0.00314484	0.619594	5.17788e-07	0.116481	0.874024
P50479	PDLIM4	PDLI4_HUMAN	PDZ and LIM domain protein 4	0.642559	2.36519e-13	0.770231	5.55112e-17	0.137266	0.761313
P35080	PFN2	PROF2_HUMAN	Profilin-2	-0.382505	0.0844815	-0.419567	0.00903119	-0.121069	0.895258
O95394	PGM3	AGM1_HUMAN	Phosphoacetylglucosamine mutase;Isoform 3 of Phosphoacetylglucosamine mutase	0.247108	0.446344	0.441934	0.030433	0.155185	0.926482
Q15149	PLEC	PLEC_HUMAN	Plectin	-0.420839	0.00135747	-0.394436	0.00121451	-0.152084	0.836379
O00469	PLOD2	PLOD2_HUMAN	Procollagen-lysine,2-oxoglutarate 5-dioxygenase 2;Isoform 2 of Procollagen-lysine,2-oxoglutarate 5-dioxygenase 2	0.242916	0.0296938	0.271697	0.0202211	0.0648149	0.952113
O15162	PLSCR1	PLS1_HUMAN	Phospholipid scramblase 1;Isoform 2 of Phospholipid scramblase 1	1.70288	0.00108161	0.908613	0.0774587	1.80729	0.00471552
P29590	PML	PML_HUMAN	Protein PML	0.910715	4.5058e-14	0.479706	2.65703e-07	0.671593	3.27618e-09
Q8TCS8	PNPT1	PNPT1_HUMAN	Polyribonucleotide nucleotidyltransferase 1, mitochondrial	0.334786	0.027493	0.0850162	0.917717	0.479002	0.000963492
P30405	PPIF	PPIF_HUMAN	Peptidyl-prolyl cis-trans isomerase F, mitochondrial	0.771245	0.00322761	0.831962	2.60153e-05	0.0760923	0.954377
Q9Y570	PPME1	PPME1_HUMAN	Protein phosphatase methylesterase 1;Isoform 4 of Protein phosphatase methylesterase 1	-0.309764	0.0061394	-0.23753	0.0110435	-0.0220079	0.96461
Q6NYC8	PPP1R18	PPR18_HUMAN	Phostensin	0.366883	0.0076784	0.147506	0.820881	0.0783957	0.951117
P60891	PRPS1	PRPS1_HUMAN	Ribose-phosphate pyrophosphokinase 1	-0.223249	0.382385	-0.325186	2.40951e-05	0.0561888	0.957905
P40306	PSMB10	PSB10_HUMAN	Proteasome subunit beta type-10	0.992174	0.0102388	0.741078	0.303775	0.781693	0.416021
Q06323	PSME1	PSME1_HUMAN	Proteasome activator complex subunit 1	0.43407	8.94608e-05	0.211367	0.362872	0.247069	0.397488
Q9UL46	PSME2	PSME2_HUMAN	Proteasome activator complex subunit 2	0.646901	0.01049	0.27619	0.683417	0.413417	0.484447
Q13308	PTK7	PTK7_HUMAN	Inactive tyrosine-protein kinase 7;Isoform 6 of Inactive tyrosine-protein kinase 7	-0.319577	0.00194718	-0.165593	0.492103	-0.0115221	0.965633
Q92626	PXDN	PXDN_HUMAN	Peroxidasin homolog	0.270522	0.176027	0.40321	0.00358424	0.105106	0.922963
Q9P258	RCC2	RCC2_HUMAN	Protein RCC2	0.272128	0.0107621	0.0819263	0.880895	-0.0279564	0.963538
Q96D15	RCN3	RCN3_HUMAN	Reticulocalbin-3	0.306926	0.00494362	0.169602	0.434266	0.0962556	0.922206
Q14699	RFTN1	RFTN1_HUMAN	Raftlin	0.265337	0.108684	0.342151	0.00188052	-0.979604	0.951589
Q13671	RIN1	RIN1_HUMAN	Ras and Rab interactor 1;Isoform RIN1-delta of Ras and Rab interactor 1	-1.11226	0.00926631	-0.794158	0.0639894	-0.345773	0.806802
Q6ZS17	RIPOR1	RIPR1_HUMAN	Rho family-interacting cell polarization regulator 1;Isoform 2 of Rho family-interacting cell polarization regulator 1;Isoform 3 of Rho family-interacting cell polarization regulator 1;Isoform 4 of Rho family-interacting cell polarization regulator 1	0.568818	4.93579e-08	0.215173	0.467763	0.105889	0.934634
P23921	RRM1	RIR1_HUMAN	Ribonucleoside-diphosphate reductase large subunit	-0.370117	0.00705253	-0.194666	0.502592	0.0465368	0.962158
Q9Y3Z3	SAMHD1	SAMH1_HUMAN	Deoxynucleoside triphosphate triphosphohydrolase SAMHD1	0.768828	7.02752e-11	0.0900913	0.9011	1.27675	3.06825e-15
O00560	SDCBP	SDCB1_HUMAN	Syntenin-1	0.343313	0.00505987	0.251714	0.221999	-0.00991692	0.965929
P31040	SDHA	SDHA_HUMAN	Succinate dehydrogenase [ubiquinone] flavoprotein subunit, mitochondrial	-0.277467	0.0138369	-0.283664	0.0253638	-0.00110209	0.966745
O15027	SEC16A	SC16A_HUMAN	Protein transport protein Sec16A	0.0515515	0.96	0.306313	0.0169174	0.131923	0.891001
O75396	SEC22B	SC22B_HUMAN	Vesicle-trafficking protein SEC22b	0.329439	0.00438285	0.426747	1.25764e-06	0.110659	0.864229
P50452	SERPINB8	SPB8_HUMAN	Serpin B8	0.447699	0.00518009	0.544326	0.000507998	0.0433837	0.96341
Q15043	SLC39A14	S39AE_HUMAN	Zinc transporter ZIP14;Isoform 2 of Zinc transporter ZIP14;Isoform 3 of Zinc transporter ZIP14	1.12108	0.00460518	1.65826	7.10642e-06	0.24206	0.903586
Q8NBI5	SLC43A3	S43A3_HUMAN	Solute carrier family 43 member 3;Isoform 2 of Solute carrier family 43 member 3	0.208318	0.811971	0.455338	0.0464491	0.175355	0.869481
P53814	SMTN	SMTN_HUMAN	Smoothelin;Isoform B2 of Smoothelin;Isoform B3 of Smoothelin	0.522595	4.61188e-07	0.422883	6.07135e-06	0.0330241	0.963949
P04179	SOD2	SODM_HUMAN	Superoxide dismutase [Mn], mitochondrial;Isoform 4 of Superoxide dismutase [Mn], mitochondrial	2.62897	6.48559e-12	3.36253	2.48135e-14	0.773035	0.524096
Q99523	SORT1	SORT_HUMAN	Sortilin	-0.624116	0.000154077	-0.511582	0.00140862	-0.137433	0.883619
P23497	SP100	SP100_HUMAN	Nuclear autoantigen Sp-100	0.717433	5.17428e-05	0.297032	0.495851	0.876372	4.04574e-06
Q9Y6N5	SQOR	SQOR_HUMAN	Sulfide:quinone oxidoreductase, mitochondrial	0.783625	2.21724e-10	0.671459	3.14632e-08	0.265894	0.185066
Q13501	SQSTM1	SQSTM_HUMAN	Sequestosome-1	0.534478	6.95342e-05	0.0960744	0.946612	-0.281054	0.957531
P42224	STAT1	STAT1_HUMAN	Signal transducer and activator of transcription 1-alpha/beta	1.10735	1.4803e-16	0.336333	0.000129334	1.40752	0
P52630	STAT2	STAT2_HUMAN	Signal transducer and activator of transcription 2;Isoform 2 of Signal transducer and activator of transcription 2	0.558924	0.0197625	0.179461	0.882014	1.03915	4.36108e-06
O94901	SUN1	SUN1_HUMAN	SUN domain-containing protein 1;Isoform 8 of SUN domain-containing protein 1;Isoform 9 of SUN domain-containing protein 1	-0.296702	0.00367709	-0.17067	0.539772	-0.0594423	0.957782
Q03518	TAP1	TAP1_HUMAN	Antigen peptide transporter 1	1.19979	1.36742e-07	0.386137	0.29048	0.57628	0.0786107
Q03519	TAP2	TAP2_HUMAN	Antigen peptide transporter 2	1.65222	2.52252e-06	0.86294	0.0022931	1.00066	0.00377084
O15533	TAPBP	TPSN_HUMAN	Tapasin;Isoform 2 of Tapasin;Isoform 3 of Tapasin	1.66464	2.03404e-11	0.763471	0.000335354	0.917405	3.42331e-05
P02786	TFRC	TFR1_HUMAN	Transferrin receptor protein 1	0.286053	0.00530459	0.70878	2.51454e-12	-0.0392499	0.960881
P07996	THBS1	TSP1_HUMAN	Thrombospondin-1	-0.639888	0.0426779	-0.408005	0.0260225	-0.0586071	0.959368
Q9UDY2	TJP2	ZO2_HUMAN	Tight junction protein ZO-2	0.266625	0.000534668	-0.10721	0.664917	-0.0446395	0.958238
Q03169	TNFAIP2	TNAP2_HUMAN	Tumor necrosis factor alpha-induced protein 2	2.12592	0.00289776	2.25191	0.023615	-1.30158	0.862367
Q9C0C2	TNKS1BP1	TB182_HUMAN	182 kDa tankyrase-1-binding protein	0.485566	1.75982e-07	0.300066	0.00349082	0.171141	0.650642
Q9HBL0	TNS1	TENS1_HUMAN	Tensin-1	-0.352954	0.00597779	-0.21643	0.150056	0.0513119	0.957874
P09493	TPM1	TPM1_HUMAN	Tropomyosin alpha-1 chain	-0.220848	0.138686	-0.298791	0.000317209	-0.0567318	0.951612
P07951	TPM2	TPM2_HUMAN	Tropomyosin beta chain	-0.34431	0.00630366	-0.385997	0.000481475	-0.132933	0.833319
Q14258	TRIM25	TRI25_HUMAN	E3 ubiquitin/ISG15 ligase TRIM25	0.522158	8.15744e-08	0.210372	0.0311864	0.735315	2.07649e-09
P68366	TUBA4A	TBA4A_HUMAN	Tubulin alpha-4A chain;Isoform 2 of Tubulin alpha-4A chain	-0.441165	0.169547	-0.29544	0.0366446	-0.0969281	0.951972
O14933	UBE2L6	UB2L6_HUMAN	Ubiquitin/ISG15-conjugating enzyme E2 L6	1.70787	0.0172763	1.19877	0.583833	1.02418	0.245119
Q16763	UBE2S	UBE2S_HUMAN	Ubiquitin-conjugating enzyme E2 S	0.19111	0.289356	0.34984	2.22895e-05	-0.248737	0.949644
Q9BZX2	UCK2	UCK2_HUMAN	Uridine-cytidine kinase 2	0.310969	0.0216309	0.282474	0.0188494	0.077587	0.928913
P46939	UTRN	UTRO_HUMAN	Utrophin;Isoform 2 of Utrophin	-0.452396	2.91686e-07	-0.298598	0.00208158	-0.138318	0.750453
P08670	VIM	VIME_HUMAN	Vimentin	0.332499	0.00171394	0.134779	0.604644	0.00464365	0.966254
O15231	ZNF185	ZN185_HUMAN	Zinc finger protein 185	-0.229409	0.0151751	-0.337677	1.40616e-05	-0.0436809	0.96018
