# Supplementary material for: Profiling the proteomic inflammatory state of human astrocytes using DIA mass spectrometry
Source: J Neuroinflammation. 2018 Nov 30;15:331. doi: 10.1186/s12974-018-1371-6 (PMC6267034; doi:10.1186/s12974-018-1371-6)
Supplement: Supplementary file 7 — Biological pathways associated with each cluster of proteins. (XLSX 13 kb) [file 12974_2018_1371_MOESM7_ESM.xlsx]

## Sheet: Sheet1
# Cluster	Biological pathway	FDR
1	Immune response_Antigen presentation by MHC class I, classical pathway	1.20338e-16
1	Immune response_IFN-alpha/beta signaling via JAK/STAT	0.000164545
1	Role of IL-23/ T17 pathogenic axis in psoriasis	0.00189475
1	Immune response_Role of DAP12 receptors in NK cells	0.00189475
1	Immune response_Antigen presentation by MHC class I: cross-presentation	0.00853598
1	wtCFTR and deltaF508 traffic / Membrane expression (normal and CF)	0.0275552
1	Immune response_Antiviral actions of Interferons	0.0287881
1	Immune response_IFN-alpha/beta signaling via MAPKs	0.053847
1	DNA damage_Role of SUMO in p53 regulation	0.146399
1	Schema: Initiation of T cell recruitment in allergic contact dermatitis	0.146399
2	Apoptosis and survival_TNFR1 signaling pathway	4.56037e-05
2	Signal transduction_NF-kB activation pathways	5.47152e-05
2	Apoptosis and survival_APRIL and BAFF signaling	0.000498949
2	Apoptosis and survival_Anti-apoptotic TNFs/NF-kB/Bcl-2 pathway	0.000506045
2	Role of B cells in SLE	0.00148388
2	Immune response_T regulatory cell-mediated modulation of antigen-presenting cell functions	0.00206563
2	Apoptosis and survival_Lymphotoxin-beta receptor signaling	0.00937607
2	Signal transduction_PTMs in BAFF-induced canonical NF-kB signaling	0.00937607
2	Immune response_B cell antigen receptor (BCR) pathway	0.00937607
2	Immune response_TNF-R2 signaling pathways	0.00937607
3	Development_Role of nicotinamide in G-CSF-induced granulopoiesis	0.0411454
3	Cytoskeleton remodeling_ESR1 action on cytoskeleton remodeling and cell migration	0.0411454
3	Transcription_HIF-1 targets	0.0411454
3	Development_Glucocorticoid receptor signaling	0.0411454
3	Immune response_Antigen presentation by MHC class I: cross-presentation	0.0411454
3	Development_Osteopontin signaling in osteoclasts	0.0479329
3	Role of red blood cell adhesion to endothelium in vaso-occlusion in Sickle cell disease	0.0532443
3	Cell adhesion_Cell-matrix glycoconjugates	0.0532443
3	Protein folding and maturation_Angiotensin system maturation \ Human version	0.0532443
3	Cytoskeleton remodeling_Hyaluronic acid/ CD44 signaling pathways	0.0532443
4	Immune response_IFN-alpha/beta signaling via JAK/STAT	1.60215e-16
4	Immune response_Antiviral actions of Interferons	4.77465e-10
4	Immune response_IFN-alpha/beta signaling via MAPKs	4.29819e-07
4	Development_Angiotensin signaling via STATs	7.457e-07
4	Immune response _IFN gamma signaling pathway	5.99934e-06
4	SLE genetic marker-specific pathways in B cells	0.00234935
4	Development_PDGF signaling via STATs and NF-kB	0.00641891
4	Signal transduction_PTMs in IL-17-induced CIKS-independent signaling pathways	0.0116103
4	Immune response_Platelet activating factor/ PTAFR pathway signaling	0.0142173
4	Immune response_Role of PKR in stress-induced antiviral cell response	0.0142173
5	Cytoskeleton remodeling_Keratin filaments	0.00157375
5	Cell adhesion_Role of tetraspanins in the integrin-mediated cell adhesion	0.00157375
5	wtCFTR and deltaF508 traffic / Membrane expression (normal and CF)	0.00216315
5	Development_S1P2 and S1P3 receptors in cell proliferation and differentiation	0.0194812
5	Cell adhesion_Alpha-4 integrins in cell migration and adhesion	0.0298683
5	Cytoskeleton remodeling_Hyaluronic acid/ CD44 signaling pathways	0.0346524
5	Development_TGF-beta-dependent induction of EMT via RhoA, PI3K and ILK	0.0346524
5	Cytoskeleton remodeling_Regulation of actin cytoskeleton organization by the kinase effectors of Rho GTPases	0.0477683
5	Regulation of CFTR activity (normal and CF)	0.0483537
5	Blood coagulation_GPIb-IX-V-dependent platelet activation	0.0661982
6	Cytoskeleton remodeling_Keratin filaments	0.000243882
6	Transcription_HIF-1 targets	0.0836467
6	Apoptosis and survival_Granzyme B signaling	0.0836467
6	Development_Hedgehog and PTH signaling pathways in bone and cartilage development	0.0836467
6	Role of red blood cell adhesion to endothelium in vaso-occlusion in Sickle cell disease	0.0836467
6	Role of cell adhesion in vaso-occlusion in Sickle cell disease	0.0935301
6	Stimulation of TGF-beta signaling in lung cancer	0.0992783
6	Immune response_IL-4-responsive genes in type 2 immunity	0.179023
6	Immune response_Regulatory role of C1q in platelet activation	0.191036
6	Cytoskeleton remodeling_Substance P mediated membrane blebbing	0.191036
